# Supplementary material
Source: HighWire-hosted journal article supplement (https://www.annfammed.org/highwire/filestream/14164/field_highwire_adjunct_files/0/Stickler.pdf)
Supplement: Stickler.pdf [file Stickler.pdf]

## Supplemental material for:

Stickler ZR, Carlson PN, Myers L, et al. Community paramedic Mobile COVID-19 Unit serving people experiencing homelessness. *Ann Fam Med*. 2021;19(6):562.

*Zachary R. Stickler, NRP, AAS<sup>1</sup>*

*Peter N. Carlson, MBA<sup>1</sup>*

*Lucas Myers, NRP<sup>1</sup>*

*Jill Ryan Schultz, NRP, AAS<sup>1</sup>*

*Teresa Swenson, NRP, BS<sup>1</sup>*

*Candice Darling, NRP, AAS<sup>1</sup>*

*Chad Liedl, MS, RN<sup>1</sup>*

*Rozalina G. McCoy, MD, MS<sup>1-3</sup>*

<sup>1</sup> Mayo Clinic Ambulance Service, Rochester, Minnesota

<sup>2</sup> Division of Community Internal Medicine, Department of Medicine, Mayo Clinic, Rochester, Minnesota

<sup>3</sup> Mayo Clinic Robert D. and Patricia E. Kern Center for the Science of Health Care Delivery, Rochester, Minnesota

**Acknowledgments:** We are grateful to Dr. Anu Luke (Mayo Clinic Ambulance Service, Mayo Clinic Department of Emergency Medicine) and Michael Juntunen (Mayo Clinic Ambulance Service) for institutional support, Colleena Ness (Mayo Clinic Informatics) for informatics support, and Mary O'Neil (Olmsted County Housing Stability Team) and Dan Fifield (co-founder and President, The Landing MN) for their contributions to the conception, planning, and implementation of this work.

**Funding support:** This work was supported by Mayo Clinic. Dr. McCoy is supported by the National Institute of Health National Institute of Diabetes and Digestive and Kidney Diseases grant K23DK114497.

## REFERENCES

1. Baggett TP, Keyes H, Sporn N, Gaeta JM. Prevalence of SARS-CoV-2 Infection in Residents of a Large Homeless Shelter in Boston. *JAMA*. 2020;323(21):2191-2192.

2. Mosites E, Parker EM, Clarke KEN, et al.; COVID-19 Homelessness Team. Assessment of SARS-CoV-2 Infection Prevalence in Homeless Shelters - Four U.S. Cities, March 27-April 15, 2020. *MMWR Morb Mortal Wkly Rep*. 2020;69(17):521-522.

3. Tsai J, Wilson M. COVID-19: a potential public health problem for homeless populations. *Lancet Public Health*. 2020;5(4):e186-e187.

4. Point-in-Time Count MN-502 Rochester/Southeast Minnesota CoC. Three River Community Action. [https://threeriverscap.org/sites/default/files/pittrendsummary09-20\\_w\\_hdx\\_summ.pdf](https://threeriverscap.org/sites/default/files/pittrendsummary09-20_w_hdx_summ.pdf). Published 2020. Updated Aug 2020. Accessed Jan 12, 2021.

5. Culhane D, Treglia R, Steif K, Kuhn R, Byrne T. Estimated Emergency and Observational/Quarantine Bed Need for the US Homeless Population Related to COVID-19 Exposure by County; Projected Hospitalizations, Intensive Care Units and Mortality. [endhomelessness.org](https://endhomelessness.org/wp-content/uploads/2020/03/COVID-paper_clean-636pm.pdf). [https://endhomelessness.org/wp-content/uploads/2020/03/COVID-paper\\_clean-636pm.pdf](https://endhomelessness.org/wp-content/uploads/2020/03/COVID-paper_clean-636pm.pdf). Published 2020. Updated 03/27/2020. Accessed Jan 10, 2021.

6. Aldridge RW, Story A, Hwang SW, et al. Morbidity and mortality in homeless individuals, prisoners, sex workers, and individuals with substance use disorders in high-income countries: a systematic review and meta-analysis. *Lancet*. 2018;391(10117):241-250.

7. Baggett TP, Liauw SS, Hwang SW. Cardiovascular Disease and Homelessness. *J Am Coll Cardiol*. 2018;71(22):2585-2597.
